# Supplementary material
Source: MDPI journal article supplement (https://www.mdpi.com/2079-9284/9/6/132)
Supplement: s1 [file s1]

# Phytochemical characterization of *Philipendula vulgaris* extracts for potential uses as cosmetic ingredients

Laura Rubio<sup>1,2,\*</sup>, M<sup>el</sup> Carmen Vali<sup>no</sup><sup>3,4</sup>, M<sup>es</sup>us Exp<sup>osito</sup><sup>3,4</sup>, Marta Lores<sup>2</sup> and Carmen Garcia-Jares<sup>1,2</sup>

<sup>1</sup> CRETUS, Department of Analytical Chemistry, Nutrition and Food Science, Universidade de Santiago de Compostela, E-15782, Santiago de Compostela, Spain

<sup>2</sup> Laboratory of Research and Development of Analytical Solutions (LIDSA), Department of Analytical Chemistry, Nutrition and Food Science, Universidade de Santiago de Compostela, E-15782, Santiago de Compostela, Spain

<sup>3</sup> Milhulloa S. Coop. Galega. Lugar Coto 1, E-27204, Palas de Rei, Lugo, Spain (M.C.V; M.J.E.)

<sup>4</sup> Cosmética Muuhlloa SL. Lugar de Cumbraos 1, E-27215, Monterroso, Lugo, Spain.

\* Correspondence: laura.rubio.lareu@usc.es (L.R.); Tel.: +34-881814379

## Content:

**Table S1.** Phenolic compounds identified: CAS number, molecular mass (Mm), retention times (Rt), ionization mode, MS/MS transitions and coefficients of determination (R<sup>2</sup>).

**Table S1.** Phenolic compounds identified: CAS number, molecular mass (Mm), retention times (Rt), ionization mode, MS/MS transitions and coefficients of determination (R<sup>2</sup>).

| Phenolic compound              | CAS        | Mm<br>(g mol <sup>-1</sup> ) | Rt<br>(min) | Ionization<br>mode <sup>a</sup> | MS/MS transitions <sup>b</sup>                                              | R <sup>2</sup> |
|--------------------------------|------------|------------------------------|-------------|---------------------------------|-----------------------------------------------------------------------------|----------------|
| Gallic acid                    | 149-91-7   | 170.1                        | 2.34        | -                               | <u>169.02 → 125.04 (17)</u><br>169.02 → 153.1 (15)                          | 0.9965         |
| Phloroglucinic acid            | 71989-93-0 | 188.1                        | 3.28        | +                               | <u>168.98 → 150.99 (17)</u><br>168.98 → 83.02 (23)<br>168.98 → 107.02 (22)  | 0.9945         |
| 3,4-dihydroxybenzaldehyde      | 139-85-5   | 138.1                        | 4.69        | +                               | <u>137.07 → 136.11 (21)</u><br>137.07 → 91.09 (24)<br>137.07 → 92.13 (25)   | 0.9948         |
| Gentisic acid                  | 490-79-9   | 117.1                        | 4.85        | +                               | <u>152.96 → 108.00 (24)</u><br>152.96 → 81.02 (21)<br>152.96 → 109.01 (16)  | 0.9949         |
| 3- hydroxybenzoic acid         | 99-06-9    | 138.1                        | 5.23        | -                               | <u>136.94 → 93.07 (14)</u><br>136.94 → 65.10 (24)<br>136.94 → 91.01 (32)    | 0.9969         |
| 4-hydroxybenzoic acid          | 99-96-7    | 138.1                        | 5.24        | -                               | <u>137.00 → 93.00 (17)</u><br>137.00 → 65.00 (27)                           | 0.9985         |
| Catechin                       | 18829-70-4 | 290.3                        | 5.25        | -                               | <u>289.01 → 245.02 (17)</u><br>289.01 → 203.12 (22)                         | 0.9868         |
| Procyanidin B1                 | 20315-25-7 | 578.5                        | 5.30        | -                               | <u>577.03 → 407.06 (26)</u><br>577.03 → 288.93 (25)<br>577.03 → 424.98 (26) | 0.9958         |
| γ-resorcylic acid <sup>c</sup> | 303-07-1   | 154.1                        | 5.54        | +                               | <u>153.00 → 109.05 (17)</u><br>153.00 → 65.09 (21)<br>153.00 → 135.02 (16)  | 0.9996         |
| Procyanidin B2                 | 29106-49-8 | 578.5                        | 5.74        | -                               | <u>577.03 → 407.06 (26)</u><br>577.03 → 288.93 (25)<br>577.03 → 424.98 (26) | 0.9946         |
| 4-Hydroxybenzaldehyde          | 123-08-0   | 122.1                        | 5.75        | +                               | <u>122.97 → 95.05 (13)</u><br>122.97 → 51.10 (36)<br>122.97 → 77.05 (20)    | 0.9887         |
| Caffeic acid                   | 331-39-5   | 180.2                        | 6.11        | -                               | <u>178.98 → 135.03 (19)</u><br>178.98 → 134.01 (28)                         | 0.9876         |
| Procyanidin C1                 | 37064-30-5 | 866.8                        | 6.30        | -                               | <u>577.03 → 288.93 (25)</u><br>577.03 → 407.07 (26)<br>577.03 → 424.98 (26) | 0.9994         |
| 4-hydroxycinnamic acid         | 501-98-4   | 164.2                        | 7.29        | +                               | <u>163.02 → 119.07 (18)</u><br>163.02 → 93.07 (37)<br>163.02 → 117.05 (38)  | 0.9951         |
| Quercetin-3-glucuronide        | 22688-79-5 | 478.4                        | 9.54        | +                               | <u>479.09 → 461.50 (14)</u><br>479.09 → 302.96 (18)                         | 0.9955         |
| Quercetin-3-glucoside          | 482-35-9   | 464.4                        | 9.80        | +                               | <u>465.07 → 256.90 (41)</u><br>465.07 → 302.97 (14)                         | 0.9924         |

*Table S1. cont.*

| Phenolic compound | CAS        | Mm<br>(g mol <sup>-1</sup> ) | Rt<br>(min) | Ionization<br>mode <sup>a</sup> | MS/MS transitions <sup>b</sup>                                                  | R <sup>2</sup> |
|-------------------|------------|------------------------------|-------------|---------------------------------|---------------------------------------------------------------------------------|----------------|
| Ellagic acid      | 476-66-4   | 302.2                        | 10.05       | -                               | <u>301.00 → 145.1 (39)</u><br>301.00 → 185.1 (29)<br>301.00 → 173.1 (36)        | 0.9916         |
| Rosmarinic acid   | 20283-92-5 | 360.3                        | 10.29       | -                               | <u>359.07 → 161.1 (23)</u><br><u>359.07 → 133.1 (42)</u><br>359.07 → 135.1 (38) | 0.9954         |
| Astragalin        | 480-10-4   | 448.4                        | 11.15       | -                               | 447.09 → 284.1 (28)<br><u>447.09 → 255.1 (40)</u><br>447.09 → 227.1 (49)        | 0.9960         |
| Quercetin         | 117-39-5   | 302.2                        | 11.81       | +                               | <u>303.09 → 229.10 (28)</u><br>303.09 → 153.04 (33)                             | 0.9863         |
| Naringenin        | 480-41-1   | 272.3                        | 12.04       | +                               | <u>273.00 → 119.00 (20)</u><br>273.00 → 147.00 (20)                             | 0.9902         |
| Luteolin          | 491-70-3   | 286.2                        | 12.09       | -                               | 285.04 → 199.00 (20)<br>285.04 → 175.00 (20)<br>285.04 → 241.00 (20)            | 0.9930         |
| Kaempferol        | 520-18-3   | 286.2                        | 12.40       | -                               | <u>285.07 → 184.91 (30)</u><br>285.07 → 239.12 (35)                             | 0.9883         |

<sup>a</sup> “-” and “+” indicate negative and positive ionization modes, respectively. <sup>b</sup> Underlined MS/MS transition used for quantification purpose. <sup>c</sup> Isomers ( $\gamma$  and  $\alpha$ ).
